# Supplementary material for: pH as a Key Factor for the Quality Assurance of the Preparation of Gastrodiae Rhizoma Formula Granules
Source: MDPI journal article supplement (doi:10.3390/molecules27228091), 2022-11-21
Supplement: s1 [file s1]

## **Supporting Information**

For

### **pH as a key factor for the quality assurance of the preparation of Gastrodiae Rhizoma formula granules**

**Shuting Xie<sup>1</sup>, Ke Min<sup>1</sup>, Hai Li<sup>1</sup>, Ying Wang<sup>1</sup>, Mincong Liu<sup>1</sup>, Ming Ma<sup>1</sup>, Desheng  
Zhou<sup>2,\*</sup>, Haijun Tu<sup>3,\*</sup>, Bo Chen<sup>1,\*</sup>**

<sup>1</sup> Key Laboratory of Phytochemical R&D of Hunan Province and Key Laboratory of Chemical  
Biology & Traditional Chinese Medicine Research of Ministry of Education, Hunan Normal  
University, Changsha, 410081, China

<sup>2</sup> The First Affiliated Hospital of Hunan University of Chinese Medicine, Changsha 410000 China

<sup>3</sup> College of Biology, Hunan University, Changsha 410000, China

## Contents

**Table S1.** The accuracy of the method was verified by adding 100% target compounds to samples.

**Table S2.** Investigation of the precision, repeatability and stability of six index components by HPLC.

**Table S3.** The pH of water extracts of eight raw materials in Huoxuerongluo Pill II.

**Table S4.** Sample information of *GR* decoction pieces.

**Figure S1.** The potential hydrolysis paths of parishin A.

**Figure S2.** HPLC chromatogram of the hydrolysis of parishin A at alkaline solution (pH = 10.30) with 10 min.

**Figure S3.** HPLC spectra of *GR* decoction piece and Huoxuerongluo Pill II.

**Figure S4.** Chemical structures of gastrodin, *p*-hydroxybenzyl alcohol, parishin A, parishin B, parishin C and parishin E in this study.

**Table S1.** The accuracy of the method was verified by adding 100% target compounds to samples. All calibration points were repeated three times ( $n = 3$ ).

| Six index components            | Background content (mg/g) | Added (mg/g) | Recovery% | RSD% |
|---------------------------------|---------------------------|--------------|-----------|------|
| gastrodin                       | 1.58                      | 1.58         | 98.8      | 1.6  |
| <i>p</i> -hydroxybenzyl alcohol | 0.10                      | 0.10         | 101.6     | 2.3  |
| parishin A                      | 3.56                      | 3.56         | 103.0     | 2.4  |
| parishin B                      | 1.99                      | 1.99         | 99.0      | 1.2  |
| parishin C                      | 0.85                      | 0.85         | 100.4     | 0.4  |
| parishin E                      | 4.27                      | 4.27         | 96.5      | 1.9  |

**Table S2.** Investigation of the precision, repeatability and stability of six index components by HPLC.

| Six index components            | Precision (RSD, %) | Repeatability (RSD, %) | Stability (RSD, %) |
|---------------------------------|--------------------|------------------------|--------------------|
| gastrodin                       | 0.65               | 1.71                   | 1.53               |
| <i>p</i> -hydroxybenzyl alcohol | 0.90               | 1.03                   | 1.22               |
| parishin A                      | 0.20               | 2.01                   | 0.28               |
| parishin B                      | 1.45               | 1.54                   | 1.33               |
| parishin C                      | 1.27               | 2.75                   | 1.44               |
| parishin E                      | 0.51               | 2.75                   | 1.49               |

**Table S3.** The pH of water extracts of eight raw materials in Huoxuerongluo Pill II.

| Eight raw materials               | pH   |
|-----------------------------------|------|
| <i>Lonicerae japonicae caulis</i> | 5.72 |
| <i>Picriae herba</i>              | 4.86 |
| <i>GR</i>                         | 4.47 |
| <i>Chaenomelis fructus</i>        | 3.37 |
| <i>Acori tatarinowii rhizoma</i>  | 4.97 |
| <i>Persicae semen</i>             | 6.16 |
| <i>Angelicae dahuricae radix</i>  | 3.51 |
| <i>Paeoniae radix rubra</i>       | 4.86 |

*Note:* The pH of Huoxuerongluo Pill II itself was 4.77.

**Table S4.** Sample information of *GR* decoction pieces.

| No. | Batch number | Place of<br>production | Production enterprise                                                    |
|-----|--------------|------------------------|--------------------------------------------------------------------------|
| S1  | 20081711     | Hubei                  | Hunan Zhenxing Chinese Medicine Co.                                      |
| S2  | TH20113003   | Hubei                  | The First Affiliated Hospital of Hunan University of<br>Chinese Medicine |
| S3  | 20100802     | Hubei                  | Hunan Zhenxing Chinese Medicine Co.                                      |
| S4  | 191206       | Hunan                  | Hunan Junhao Traditional Chinese Medicine trade Co.                      |
| S5  | 21031208     | Hunan                  | Hunan Zhenxing Chinese Medicine Co.                                      |
| S6  | 22032102     | Hunan                  | Hunan Zhenxing Chinese Medicine Co.                                      |
| S7  | 20210305     | Sichuan                | Hunan Chunzhibao Pharmaceutical Responsibility Co.                       |
| S8  | D2203074     | Sichuan                | Sichuan Xin Lotus Traditional Chinese Medicine Co.                       |
| S9  | 20211008     | Jilin                  | Hunan Yaoshengtang Chinese Medicine Technology Co.                       |
| S10 | 20201109     | Jilin                  | Hunan Yaoshengtang Chinese Medicine Technology Co.                       |
| S11 | 2021030207   | Jilin                  | Hunan Sanxiang Traditional Chinese Medicine Co.                          |
| S12 | 2201001      | Yunnan                 | Hengtang Pharmaceutical Enterprise Co.                                   |
| S13 | 2201002-1    | Yunnan                 | Hengtang Pharmaceutical Enterprise Co.                                   |
| S14 | 201810014    | Yunnan                 | Yunnan Guohe Drug Co.                                                    |

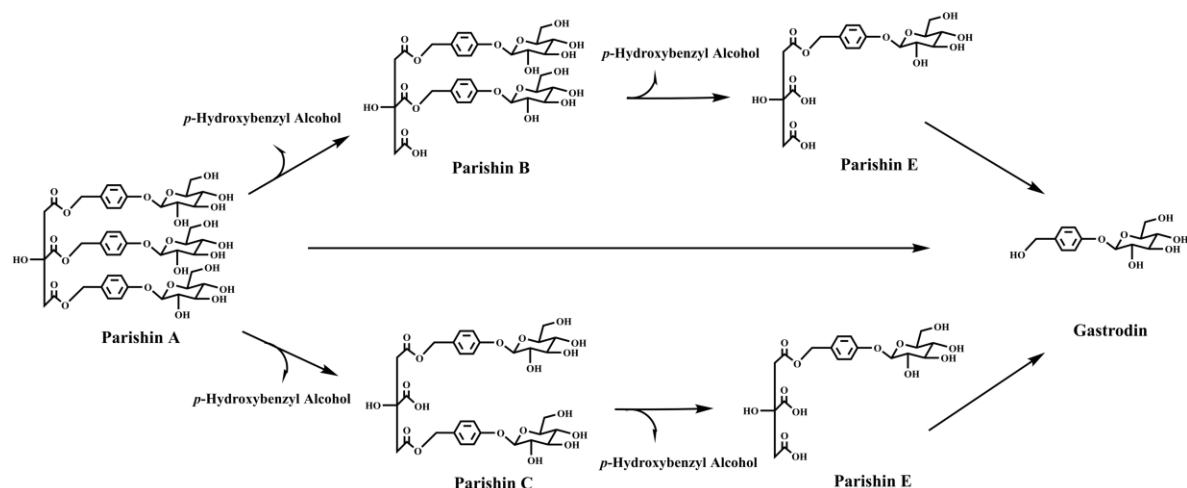

**Figure S1.** The potential hydrolysis paths of parishin A.

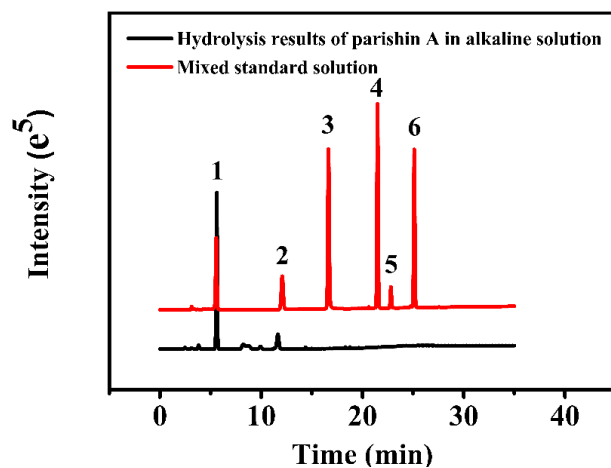

**Figure S2.** HPLC chromatogram of the hydrolysis of parishin A at alkaline solution (pH = 10.30) with 10 min. *Note:* Peak 1, 2, 3, 4, 5 and 6 refer to gastrodin, *p*-hydroxybenzyl alcohol, parishin E, parishin B, parishin C, and parishin A, respectively.

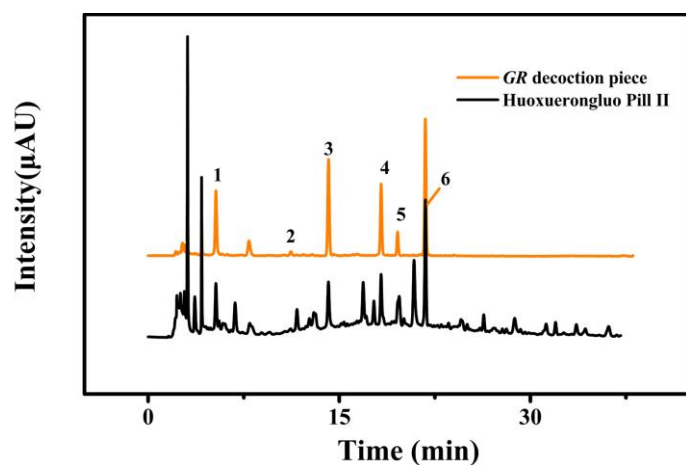

**Figure S3.** HPLC spectra of *GR* decoction piece and Huoxuerongluo Pill II. *Note:* Peak 1, 2, 3, 4, 5 and 6 refer to gastrodin, *p*-hydroxybenzyl alcohol, parishin E, parishin B, parishin C, and parishin A, respectively.

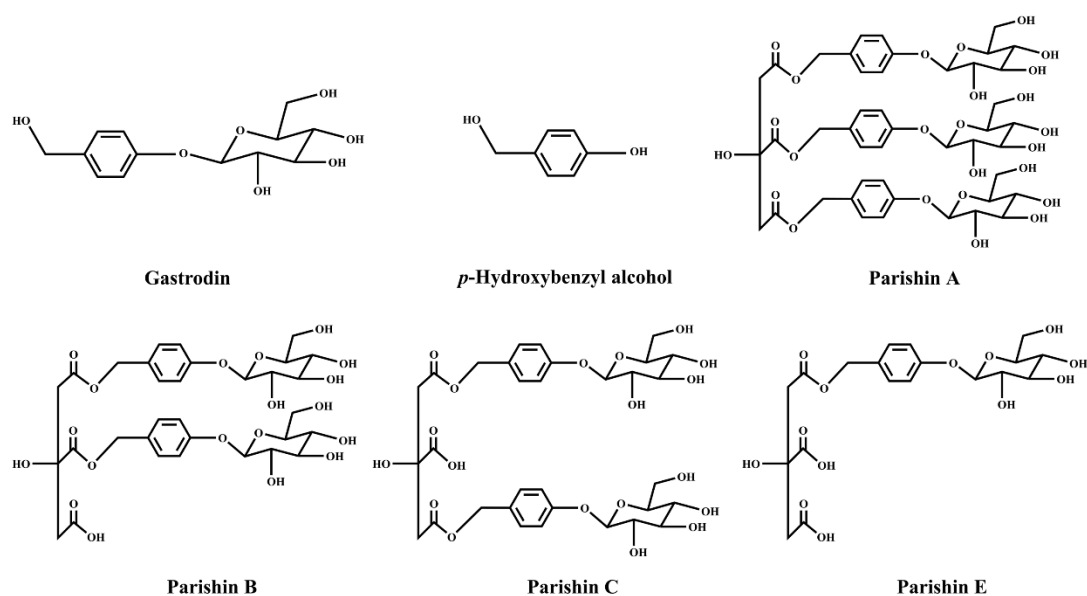

**Figure S4.** Chemical structures of gastrodin, *p*-hydroxybenzyl alcohol, parishin A, parishin B, parishin C and parishin E in this study.
